# Supplementary material
Source: Frontiers journal article supplement (https://www.frontiersin.org/articles/249200)
Supplement: Image_2.PDF [file Image_2.PDF]

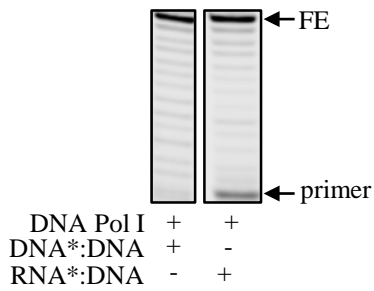

**Supplementary Figure 2: DNA primer preference is not conserved in DNA Pol I.** High fidelity DNA polymerase I (125 nM) does not have a difference in primer extension between DNA and RNA primers. Experiments performed as in Figure 1. DNA\*: DNA, fluorescently labeled DNA primer annealed to DNA template; RNA\*: DNA, fluorescently labeled RNA primer annealed to DNA template; FE, fully extended primer band.
